# Supplementary material for: A model-based clustering method to detect infectious disease transmission outbreaks from sequence variation
Source: PubMed Central journal article supplement (PMC5703573; doi:10.1371/journal.pcbi.1005868), 2017-11-13
Supplement: pcbi.1005868.s009.pdf [file pcbi.1005868.s009.pdf]

| Rate parameter |           | Set 1       |            |       | Set 2                |                       |                      |
|----------------|-----------|-------------|------------|-------|----------------------|-----------------------|----------------------|
|                |           | Fast trans. | Fast samp. | Both  | Fast trans.          | Fast samp.            | Both                 |
| Transmission   | $\beta_0$ | 0.005       | 0.005      | 0.005 | $7.5 \times 10^{-4}$ | $7.5 \times 10^{-4}$  | $7.5 \times 10^{-4}$ |
|                | $\beta_1$ | 0.135       | 0.045      | 0.135 | 0.0135               | $6.75 \times 10^{-3}$ | 0.0135               |
| Migration      | $m$       | 0.05        | 0.05       | 0.05  | 0.05                 | 0.05                  | 0.05                 |
| Mortality      | $\mu$     | 0.01        | 0.01       | 0.01  | 1.0                  | 1.0                   | 1.0                  |
| Sampling       | $\psi_0$  | 0.5         | 0.5        | 0.5   | 1.0                  | 1.0                   | 1.0                  |
|                | $\psi_1$  | 0.5         | 2.5        | 2.5   | 1.0                  | 2.0                   | 2.0                  |

Table S1: Parameter values used for birth-death SIR model simulations.
